# Supplementary material
Source: PubMed Central journal article supplement (PMC3436181)

## SUPPLEMENTAL FIGURES

**FIGURE S1.** Binding of FITC-K<sub>2</sub>Q<sub>44</sub>K<sub>2</sub> fibrils to cells deficient in Fn or the Fn receptor components,  $\alpha$ 5 or  $\beta$ 1 integrins.

(A) EDTA-lifted MEFs heterozygous (Fn<sup>+/-</sup>) or homozygous (Fn<sup>-/-</sup>) for a null mutation in the Fn gene (1) were treated with 1 $\mu$ M FITC- K<sub>2</sub>Q<sub>44</sub>K<sub>2</sub> fibrils in the presence of 1% BSA for 10min at 4°C. The average geometric mean  $\pm$ SEM of cell-associated FITC fluorescence is shown for 3 independent experiments. (B) AtT-20 mouse pituitary cells or AtT-20 cells (2) stably expressing  $\alpha$ 5 integrin (AtT-20 $\alpha$ 5) (3) were plated on tissue culture dishes coated with 0 or 10 $\mu$ g/mL fibronectin. EDTA-lifted cells were treated with 1 $\mu$ M FITC- K<sub>2</sub>Q<sub>44</sub>K<sub>2</sub> fibrils in the presence of 1% BSA for 10min at 4°C. The average geometric mean  $\pm$ SEM of cell-associated FITC fluorescence is shown for 6 (AtT-20), 2 (AtT-20 $\alpha$ 5) or 1 (AtT-20 or AtT-20 $\alpha$ 5 plated on Fn) independent experiments. (C) EDTA-lifted wild-type CHO-K1 cells, CHO cells with deficient expression of  $\alpha$ 5 integrin (CHO-B2) (4), or a CHO-B2 clone stably overexpressing  $\alpha$ 5 integrin (CHO-B2 $\alpha$ 27) (5) were treated with 1 $\mu$ M FITC- K<sub>2</sub>Q<sub>44</sub>K<sub>2</sub> fibrils in the presence of 1% BSA for 10min at 4°C. The average geometric mean  $\pm$ SEM of cell-associated FITC fluorescence is shown for 3 independent experiments. (D) EDTA-lifted GD25 mouse cells, which are deficient in  $\beta$ 1 integrin expression (6), or GD25 cells overexpressing  $\beta$ 1 integrin (GD25- $\beta$ 1A) (7) were treated with 1 $\mu$ M FITC- K<sub>2</sub>Q<sub>44</sub>K<sub>2</sub> fibrils in the presence of 1% BSA for 10min at 4°C. The average geometric mean  $\pm$ SEM of cell-associated FITC fluorescence is shown for 3 independent experiments. (E) 20 $\mu$ g of 1% Triton X-100 lysate from the indicated cell types cultured in normal FBS or FBS depleted of Fn by passing over a gelatin sepharose column were separated by SDS-PAGE and probed for Fn. (F) 20 $\mu$ g of 1% Triton X-100 lysate from the indicated cell types were separated by SDS-PAGE and probed for  $\alpha$ 5 integrin.

**FIGURE S2.** Size distribution of polyglutamine fibrils

The length and width of ~ 2830 htt<sub>exon1</sub>Q<sub>44</sub> and 2800 Q<sub>44</sub> fibrils were measured using ~ 50 quantitative negatively stained electron micrographs. The length distribution reveals that the htt<sub>exon1</sub>Q<sub>44</sub> and Q<sub>44</sub> fibrils length ranges from 25 to 100 nm with an average length of ~ 35 nm.

**FIGURE S3.** Circular dichroism of polyglutamine aggregates

(A) Far-UV circular dichroism spectra of K<sub>2</sub>Q<sub>44</sub>K<sub>2</sub> (30 $\mu$ M) in water (red triangles) and in 1.25% TFA, 1.25% HFIP (blue circles) were recorded at 20 °C on a J810 (Jasco) spectropolarimeter as indicated in the supplementary procedures section. The spectra were deconvolved using the algorithm CDSSTR available on the server Dichroweb (<http://dichroweb.cryst.bbk.ac.uk/html/home.shtml>) (B) Absorbance of amorphous and fibrillar K<sub>2</sub>Q<sub>44</sub>K<sub>2</sub> at different wavelengths.

## SUPPLEMENTAL PROCEDURES

### *Circular dichroism spectroscopy*

Far-UV CD spectra were recorded at 20°C using an AVIV dichrograph (Aviv Biomedical Inc.) equipped with a thermostatic cell holder using a 0.1 cm path length quartz cuvette. Each spectrum was the average of 10 acquisitions recorded in the 260-185 nm range with 0.5 nm steps, a bandwidth of 2 nm, and at a speed of 100 nm min<sup>-1</sup>. All spectra were solvent corrected. The voltage detected by the dichrograph was automatically gain-adjusted using with the internal photomultiplier. The CD spectra of amorphous K<sub>2</sub>Q<sub>44</sub>K<sub>2</sub> assemblies were recorded 3 hours after 40-fold dilution of K<sub>2</sub>Q<sub>44</sub>K<sub>2</sub> (1.2 mM) (in 50% TFA, 50% HFIP) in water. The CD spectra of fibrillar K<sub>2</sub>Q<sub>44</sub>K<sub>2</sub> assemblies were recorded 3 hours after dissolving dried K<sub>2</sub>Q<sub>44</sub>K<sub>2</sub> in water (final concentration 30 μM). The spectra were deconvolved using the algorithm CDSSTR available on the server Dichroweb (<http://dichroweb.cryst.bbk.ac.uk/html/home.shtml>).

### *Electron microscopy*

Length distribution measurements were performed manually on quantitative transmission electron micrographs obtained using a Jeol 1400 transmission electron microscope, an airfuge EM90 rotor (Beckman Instruments, Inc., Brea, CA) and carbon-coated 200 mesh grids after negative-staining (1% uranyl acetate). The electron micrographs were recorded with a Gatan Orius CCD camera (Gatan).

### *Cell culture*

Fn<sup>+/-</sup>, Fn<sup>-/-</sup> (19), GD25 and GD25-β1A (24,25) MEFs (kind gifts from D. Mosher, University of Wisconsin-Madison) were grown in Dulbecco's modified minimum essential medium supplemented with 10% FBS and antibiotics. GD25-β1A cells were maintained in 10 μg/mL puromycin. CHO-B2 and CHO-B2α27 cells (26,27) (kind gifts from R. Juliano, University of North Carolina) were grown in minimum essential medium (MEMα) containing nucleosides and GlutaMAX (Invitrogen) and supplemented with 10% FBS. AtT-20 pituitary cells were purchased from ATCC and cultured in F-12K medium (Invitrogen) supplemented with 2.5% FBS and 15% horse serum. AtT-20α5 cells (a kind gift from J. Schwarzbauer, Princeton University) (20,21) were grown in DMEM/F-12, HEPES (Invitrogen) supplemented with 10% FBS, 10% horse serum, 4mM L-glutamine and 0.25mg/mL G418. For growing AtT-20 cells on Fn, tissue culture flasks were pre-coated with 10 μg/mL fibronectin (Sigma) for 1h and washed three times with PBS before plating the cells. Fn-depleted FBS was prepared by passing the serum over a gelatin-sepharose column (GE Healthcare) twice, and confirming depletion by Western blot.

## References

24. Kabashi, E., Agar, J. N., Hong, Y., Taylor, D. M., Minotti, S., Figlewicz, D. A., and Durham, H. D. (2008) *J Neurochem* **105**, 2353-2366
25. Taylor, D. M., Gibbs, B. F., Kabashi, E., Minotti, S., Durham, H. D., and Agar, J. N. (2007) *The Journal of biological chemistry* **282**, 16329-16335
26. Valera, A. G., Diaz-Hernandez, M., Hernandez, F., Ortega, Z., and Lucas, J. J. (2005) *Neuroscientist* **11**, 583-594
27. Ortega, Z., Diaz-Hernandez, M., and Lucas, J. J. (2007) *Cell Mol Life Sci* **64**, 2245-2257

A

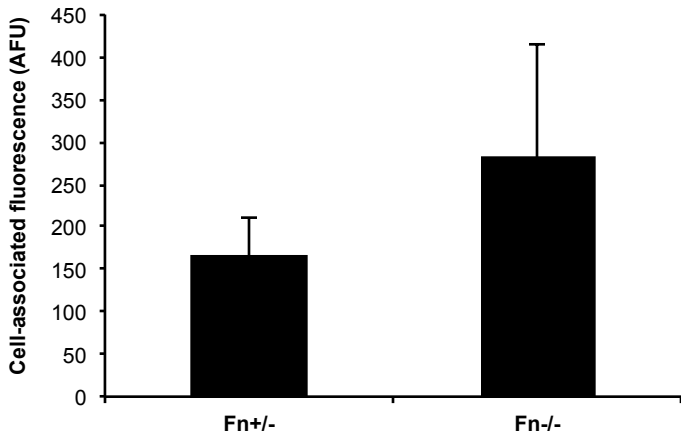

B

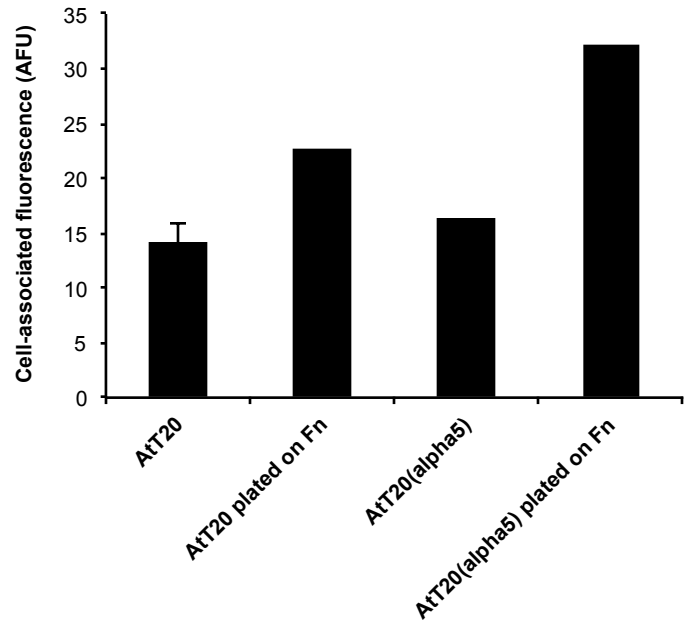

C

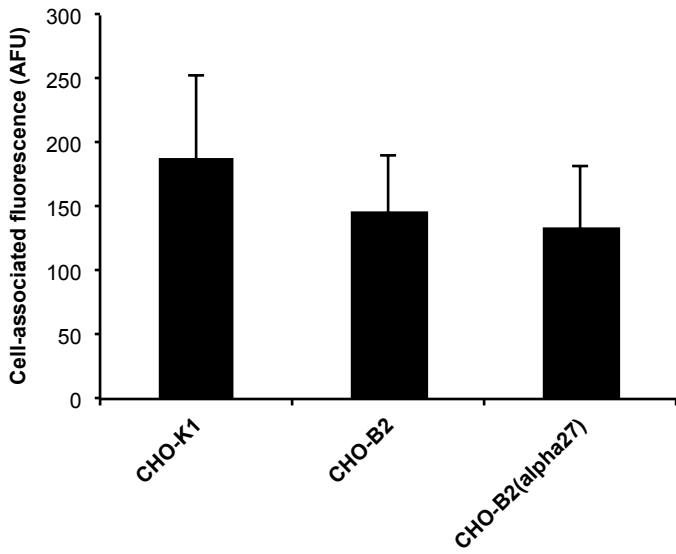

D

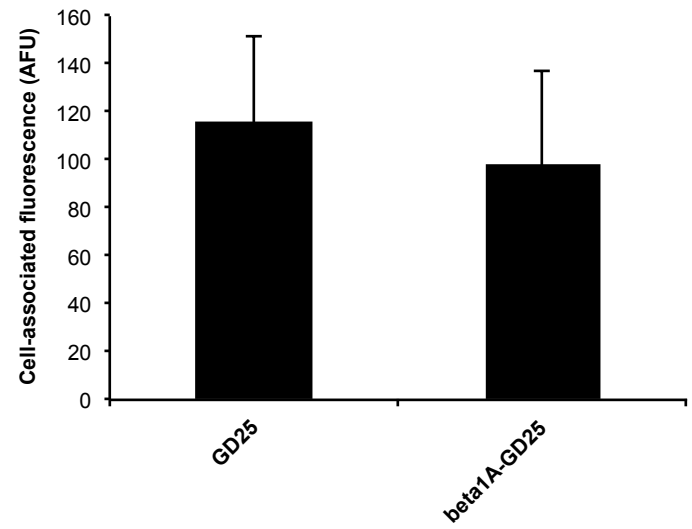

E

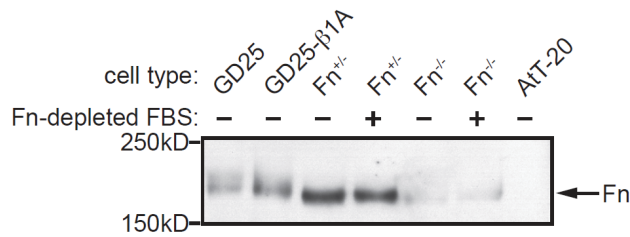

F

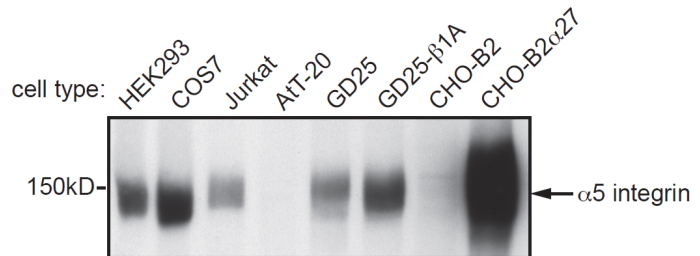

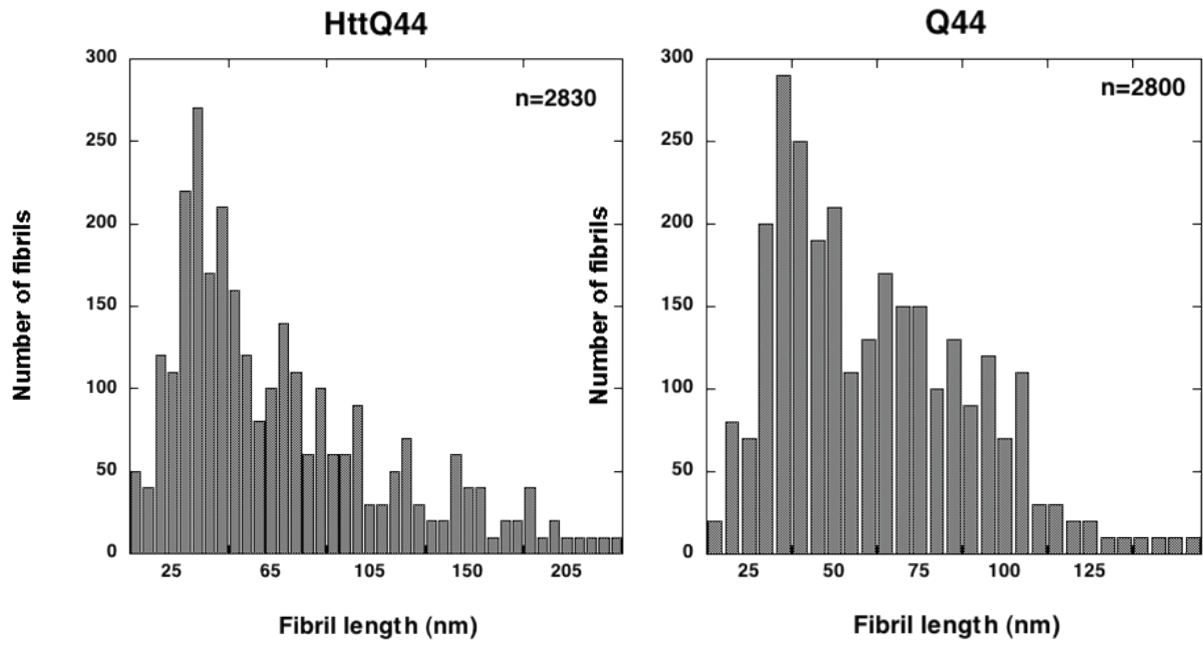

A

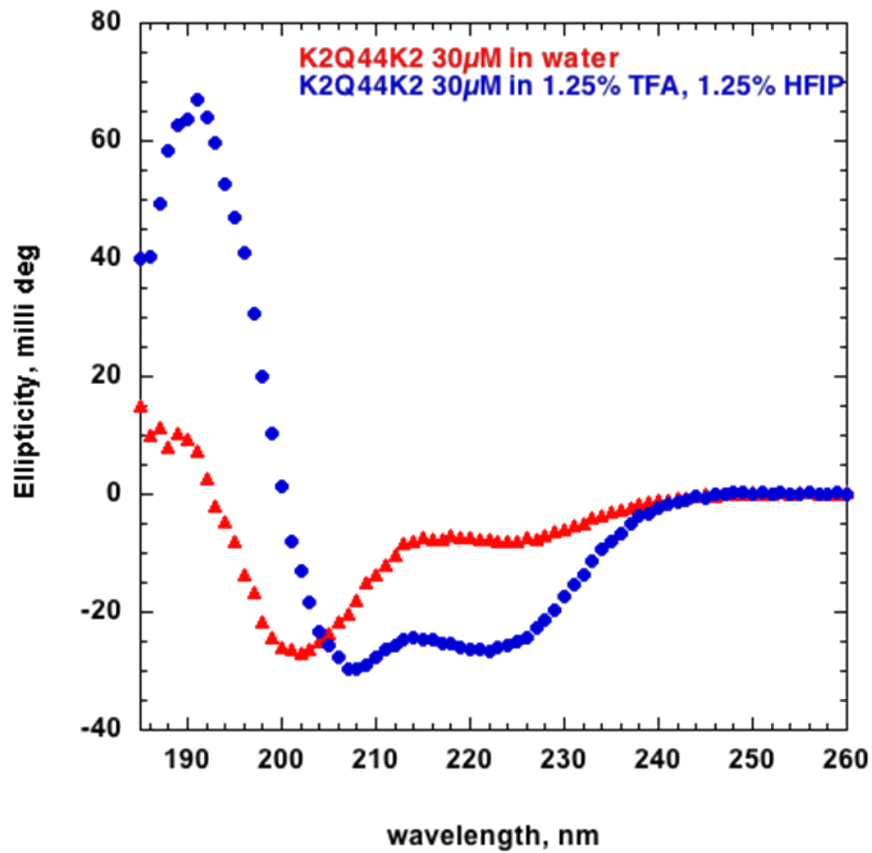

B

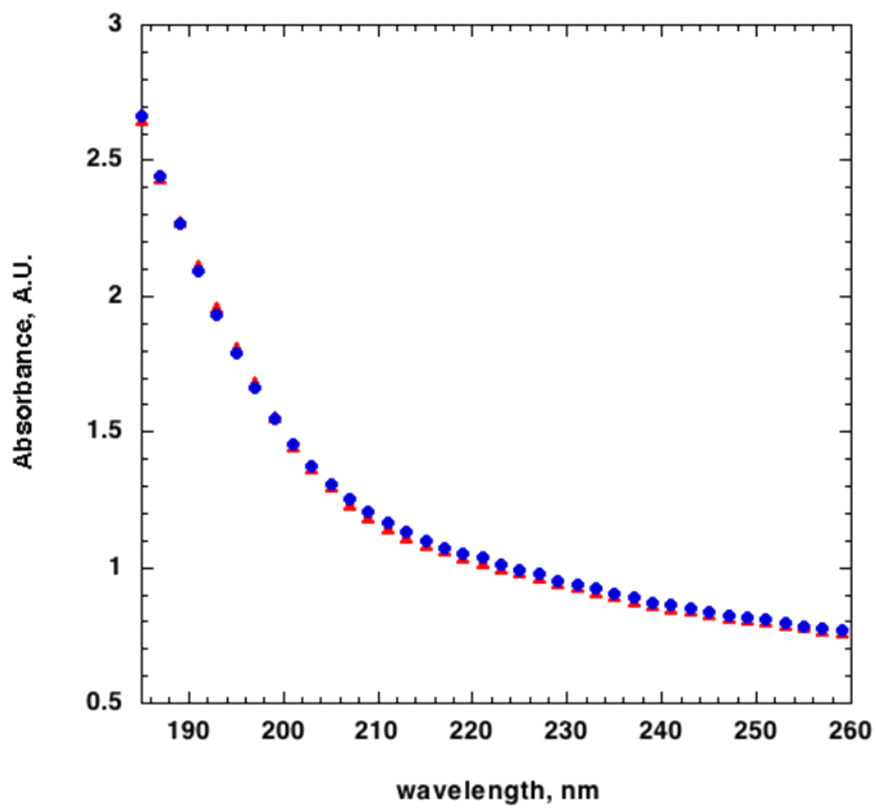

Supplement: supp_M112.372474_M112.372474_supplement.pdf [file supp_M112.372474_M112.372474_supplement.pdf]
